# Supplementary material for: Comparative metabolomics of scab-resistant and susceptible apple cell cultures in response to scab fungus elicitor treatment
Source: PubMed Central journal article supplement (PMC6294756; doi:10.1038/s41598-018-36237-y), 2018-12-14
Supplement: 41598_2018_36237_MOESM1_ESM.pdf [file 41598_2018_36237_MOESM1_ESM.pdf]

## Comparative metabolomics of scab-resistant and susceptible apple cell cultures in response to scab fungus elicitor treatment

Amol Sarkate<sup>1#</sup>, Shashank Sagar Saini<sup>1#</sup>, Deepa Teotia<sup>1</sup>, Mariam Gaid<sup>2</sup>, Javid Iqbal Mir<sup>3</sup>, Partha Roy<sup>4</sup>, Pawan Kumar Agrawal<sup>5\*</sup>, Debabrata Sircar<sup>1\*</sup>

### Supplementary information

**Supplemental Figure S1.** GC-MS chromatograms (TICs) of VIE-treated (36 hpe) cell culture of apple cultivar ‘Vista Bella’ and ‘Florina’.

**Supplemental Figure S2.** Effect of supplementation of induced cell culture metabolite noraucuparin (NA), aucuparin (A) and eriobofuran (E) on the conidial germination of scab fungus *V. inaequalis*. The ANOVA was performed to assess the statistical significance of differences between treatment ( $p < 0.001$ ). Results are means  $\pm$  SD ( $n = 3$ ).

**Supplemental Table S1.** Total number of metabolites detected by GC-MS analyses from the VIE-treated cell suspension culture of scab resistant (SR) apple cultivar ‘Florina’ and scab susceptible (SS) cultivar ‘Vista Bella’. ‘ND’ denotes metabolites detected only in ‘Florina’ and not in ‘Vista Bella’

**Supplemental Table S2.** Total number of metabolites detected from VIE-treated cell cultures of ‘Florina’. Differential metabolite accumulation was analyzed with Bonferroni corrections ( $p < 0.05$ ). Differential accumulations were expressed as significant (S;  $p < 0.05$ ) or non significant (NS;  $p > 0.05$ ).

**Supplemental Table S3.** Primers used in gene expression analyses by qRT-PCR

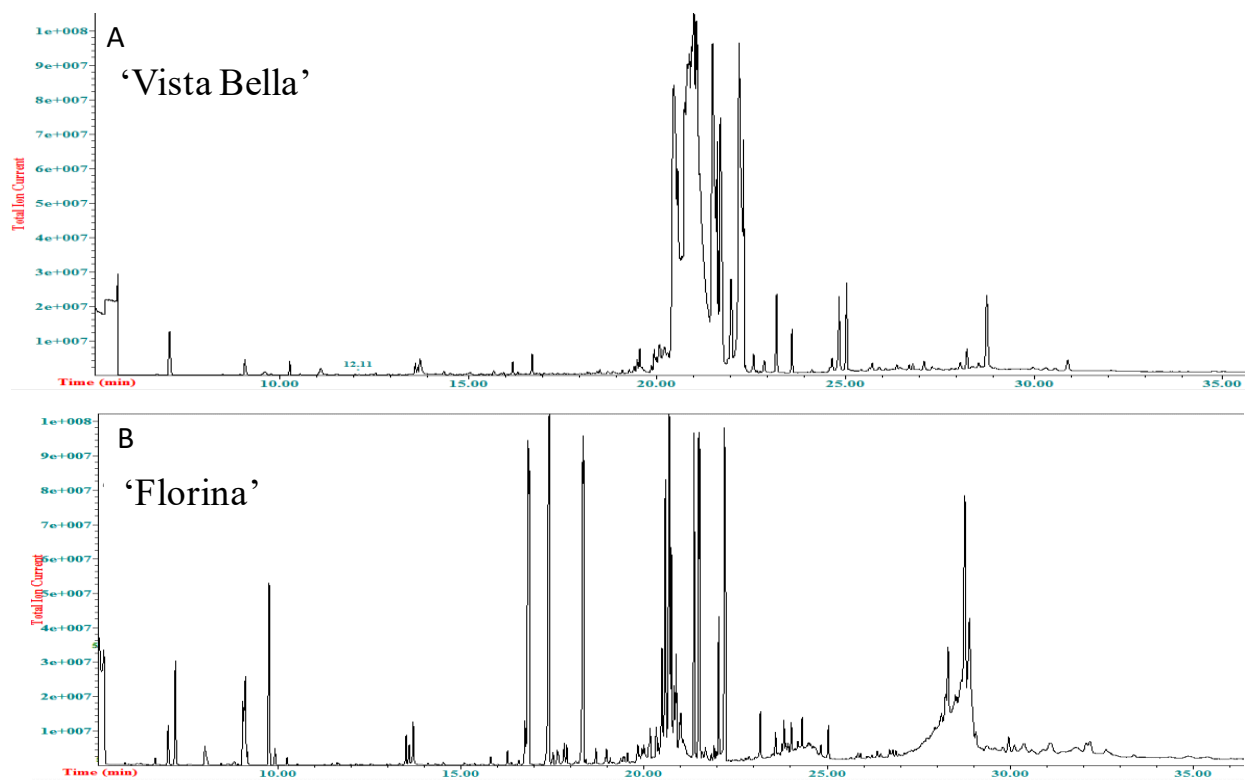

**Supplemental Figure S1.** GC-MS chromatograms (TICs) of VIE-treated (36 hpe) cell culture of apple cultivar 'Vista Bella' and 'Florina'.

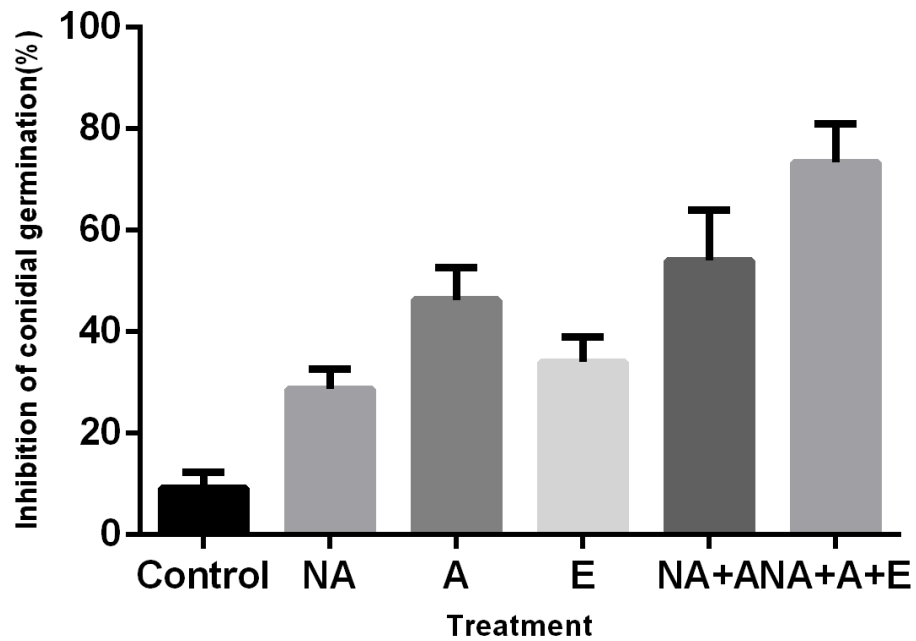

**Supplemental Figure S2.** Effect of supplementation of induced cell culture metabolite noraucuparin (NA), aucuparin (A) and eriobofuran (E) on the conidial germination of scab fungus *V. inaequalis*. The ANOVA was performed to assess the statistical significance of differences between treatment ( $p < 0.001$ ). Results are means  $\pm$  SD ( $n = 3$ ).
